# Supplementary material for: Biocompatible Magnetic Fluids of Co-Doped Iron Oxide Nanoparticles with Tunable Magnetic Properties
Source: MDPI journal article supplement (doi:10.3390/nano10061019), 2020-05-27
Supplement: s1 [file s1]

# Biocompatible Magnetic Fluids of Co-Doped Iron Oxide Nanoparticles with Tunable Magnetic Properties

Silvio Dutz <sup>1,2,\*</sup>, Norbert Buske <sup>3</sup>, Joachim Landers <sup>4</sup>, Christine Gräfe <sup>5</sup>, Heiko Wende <sup>4</sup> and Joachim H. Clement <sup>5</sup>

<sup>1</sup> Institute of Biomedical Engineering and Informatics (BMTI), Technische Universität Ilmenau, D-98693 Ilmenau, Germany

<sup>2</sup> Department of Nano Biophotonics, Leibniz Institute of Photonic Technology (IPHT), D-07745 Jena, Germany

<sup>3</sup> MagneticFluids, Köpenicker Landstraße 203, D-12437 Berlin, Germany; [ngb.buske@gmail.com](mailto:ngb.buske@gmail.com)

<sup>4</sup> Faculty of Physics and Center for Nanointegration Duisburg-Essen (CENIDE), University of Duisburg-Essen, D-47057 Duisburg, Germany; [joachim.landiers@uni-due.de](mailto:joachim.landiers@uni-due.de) (J.L.); [heiko.wende@uni-due.de](mailto:heiko.wende@uni-due.de) (H.W.)

<sup>5</sup> Department Hematology and Oncology, Jena University Hospital, D-07747 Jena, Germany; [christine.graefe@med.uni-jena.de](mailto:christine.graefe@med.uni-jena.de) (C.G.); [joachim.clement@med.uni-jena.de](mailto:joachim.clement@med.uni-jena.de) (J.H.C.)

\* Correspondence: [silvio.dutz@tu-ilmenau.de](mailto:silvio.dutz@tu-ilmenau.de); Tel.: +49-3677-691-309

Received: 29 April 2020; Accepted: 21 May 2020; Published: 27 May 2020

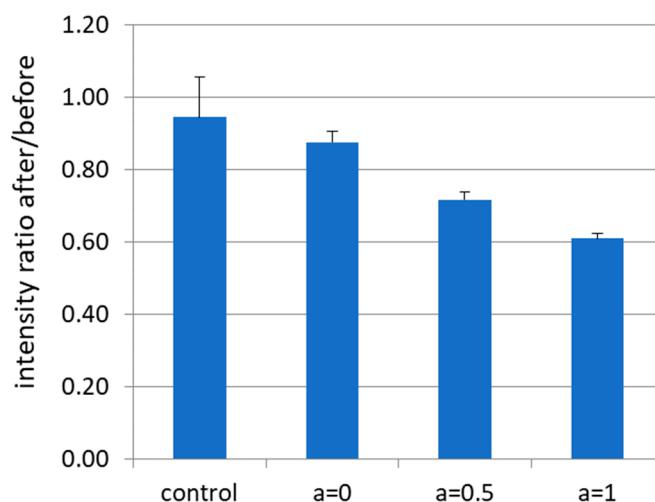

**Figure S1.** Co-ferrite MNPs interact with the fluorescent reaction product resorufin. Subconfluent HBMEC were treated with RPMI 1640 + 10% (v/v) FBS (equivalent to untreated control, see figure 9) for 24 hours. After a 30 min incubation with Presto Blue reagent and subsequent fluorescence measurement with the microplate reader, the cell cultures were supplemented with 100  $\mu\text{g}/\text{cm}^2$  of MNP as indicated. After magnetic separation, the samples were measured a second time. The ratio of fluorescence before and after MNP addition was determined; MNPs  $n = 2$ ; control  $n = 8$
